# Supplementary material
Source: Research Square preprint supplement (doi:10.21203/rs.3.rs-8956443/v1)
Supplement: Supplementary file 1 [file d72cf420a82a9b8b0a81b2a2.docx]

### ****Key Highlights of the Study****

- **Study Area & Importance**
  - Qaroun Lake is a **closed, saline lake** in Fayoum, Egypt, with high ecological and socio-economic value (fisheries, wildlife, local communities).
  - The lake has **no outlet** and depends mainly on **agricultural and domestic drainage inflows**, making it highly sensitive to changes in water quantity and quality.
- **Methodology**
  - A comprehensive **hydrodynamic and water quality assessment** was conducted using **MIKE 21, MIKE 3, ECO Lab, and Transport modules**.
  - The model successfully simulated **flow dynamics and spatial–seasonal variability** of key parameters: **salinity, temperature, BOD, and DO**.
  - Model results were validated using **field measurements**.
- **Current (Normal) Conditions**
  - Salinity and water quality parameters already **exceed environmentally acceptable limits** in several lake zones, especially near drainage inflows.
  - **BOD levels** reached about **7.6 mg/L**, indicating significant organic pollution.
  - **Dissolved Oxygen (DO)** remains relatively stable (~**7 mg/L**) but is vulnerable to thermal and salinity stress.
- **Maximum (Worst-Case) Contamination Scenario**
  - Continued reuse of untreated drainage water combined with **high summer temperatures** and **evaporation** leads to severe degradation.
  - **BOD increases** to critical levels (**12–14 mg/L**).
  - **DO drops sharply** to **2–5 mg/L**, posing serious risks to fish and aquatic life.
  - **Salinity exceeds 40 PSU**, reflecting long-term evaporation and lack of freshwater renewal.
- **Key Drivers of Degradation**
  - The **reuse of untreated agricultural drainage water** is the primary cause of declining water quality.
  - **Climate change** acts as a strong amplifying factor by increasing evaporation, salinity buildup, and oxygen depletion.
- **Environmental Impacts**
  - Degraded water quality threatens **aquatic ecosystems, fish productivity, aquaculture activities**, and the lake’s status as a **natural reserve**.
- **Management Implications**
  - There is an **urgent need for an integrated lake basin management plan**.
  - Recommended measures include:
    - Improved **treatment of drainage water**
    - Controlled **freshwater inflows**
    - **Climate-adaptive management strategies**
- **Scientific Contribution**
  - The developed modeling framework serves as a **robust decision-support tool** for evaluating future scenarios.
  - The study provides **evidence-based guidance** for restoring and sustaining Qaroun Lake’s ecological balance and long-term socio-economic value.
